# Supplementary material
Source: publisher figshare collection journal article supplement (https://frontiersin.figshare.com/ndownloader/files/20178116)
Supplement: Supplementary file 1 [file 20178116]

S3: Supplementary Material 3: The Open Standards Conservation Actions Classification v 2.0 (Conservation Measures Partnership (CMP) 2016).

| **CMP A: Target Restoration / Stress Reduction Actions** | | |
| --- | --- | --- |
| **Level 1** | **Level 2** | **Level 3** |
| A1 Land / Water Management | A1.1 Site / Area Stewardship | A1.1.1 Mechanical Actions |
| A1.1.2 Chemical Actions |
| A1.1.3 Biological Control |
| A1.1.4 Sensory Control |
| A1.1.5 Separation / Border Actions |
| A1.1.6 Ecological Management |
| A1.1.7 Genetic Manipulation |
| A1.1.8 Visitor Management |
| A1.2 Ecosystem & Natural Process Recreation | A1.2.1 Structural Components |
| A1.2.2 Abiotic Functions & Processes |
| A1.2.3 Biotic Functions & Processes |
| A2 Species Management | A2.1 Species Stewardship | A2.1.1 Population Management |
| A2.1.2 Shelter Management |
| A2.1.3 Nutrient / Water Management |
| A2.1.4 Reproduction Management |
| A2.1.5 Disease / Injury Management |
| A2.1.6 Movement / Migration Management |
| A2.1.7 Interspecific Interaction Management |
| A2.2 Species Re-Introduction & Translocation | A2.2.1 Reintroduction of Species where they previously existed |
| A2.2.2 Translocation of Species to new places |
|  | A2.2.3 Transfer of Individuals or Genes |
| A2.3 Ex-Situ Conservation | A2.3.1 Support within the Life of an Individual |
| A2.3.2 Support / Captive Breeding over Generations |
| A2.3.3 Gene Banking |
|  | A2.3.4 Genetic Reconstruction |
|  | A2.3.5 Synthetic Species Creation |

| **CMP B: Behavioural Change / Threat Reduction Actions** | | |
| --- | --- | --- |
| **Level 1** | **Level 2** | **Level 3** |
| B3 Awareness Raising | B3.1 Outreach & Communications | B3.1.1 Reported Media |
| B3.1.2 Social Media |
| B3.1.3 Ads & Marketing |
| B3.1.4 Displays |
| B3.1.5 Art |
| B3.1.6 Performances |
| B3.1.7 Person-to-Person Engagement |
|  | B3.1.8 Experiential Learning |
| B3.2 Protests & Civil Disobedience | B3.2.1 Protests Confrontations or Refusing to Engage |
| B3.2.2 Public Identification of Wrong-Doers |
| B3.2.3 Impeding Activities Legal / Illegal Passive Civil Disobedience |
|  | B3.2.4 Sabotage |
| B4 Law Enforcement & Prosecution | B4.1 Detection & Arrest | B4.1.1 Surveillance |
| B4.1.2 Patrolling |
| B4.1.3 Guarding Checkpoints / Borders |
| B4.1.4 Carrying Out Investigations |
| B4.1.5 Establishing / Maintaining Informer Networks |
| B4.1.6 Arrest & Interdiction |
| B4.2 Criminal Prosecution & Conviction | B4.2.1 Prosecuting Alleged Crimes |
| B4.2.2 Trying Alleged Crimes |
| B4.2.3 Punishing Proven Crimes Prisons, Fine Collection, Rehabilitation |
| B4.3 Non-Criminal Legal Action | B4.3.1 Civil Law Suits |
|  | B4.3.2 Agency Enforcement |
|  |  | B4.3.3 Agency or Judicial Review |
| B5 Livelihood, Economic & Moral Incentives | B5.1 Linked Enterprises & Alternative Livelihoods | B5.1.1 Linked Product-Producing Enterprises Consumptive |
| B5.1.2 Linked Ecological Service-Using Enterprises Non-Consumptive |
| B5.1.3 Non-Linked Enterprises & Livelihoods |
| B5.2 Better Products & Management Practices | B5.2.1 Developing Better Products & Practices |
| B5.2.2 Promoting Better Products & Practices |
| B5.2.3 Providing Better Products |
| B5.2.4 Providing Training or Technical Assistance For Better Practices |
| B5.2.5 Removing Barriers to Adoption of Better Products or Practices |
| B5.3 Market-Based Incentives | B5.3.1 "Green" Certification of Products or Services |
| B5.3.2 Boycotts of "Non-Green" Products or Services |
| B5.3.3 Environmental Markets |
| B5.3.4 "Green" Financing |
| B5.4 Direct Economic Incentives | B5.4.1 Direct Payments or Subsidies for Desired Behaviors |
| B5.4.2 Taxes on Undesired Behaviors |
| B5.4.3 Valuation of Ecological Services |
| B5.4.4 Monetary Awards & Prizes |
| B5.5 Non-Monetary Values | B5.5.1 Health & Social Service Benefits |
| B5.5.2 Security Benefits |
|  | B5.5.3 Spiritual / Moral / Cultural Benefits |

| **CMP C: Enabling Condition Actions** | | |
| --- | --- | --- |
| **Level 1** | **Level 2** | **Level 3** |
| C6 Conservation Designation & Planning | C6.1 Protected Area Designation &/Or Acquisition | C6.1.1 Government Protected Area |
| C6.1.2 Private Protected Area |
| C6.1.3 Community or Tribal Natural Resource Use Area |
| C6.2 Easements & Resource Rights | C6.2.1 Conservation Easements |
| C6.2.2 Specific Resource Rights |
| C6.3 Land Zoning & Designation/ Water Use | C6.3.1 Land-Use Zoning |
| C6.3.2 Conservation Area Designation Beyond Protected Areas |
| C6.4 Conservation Planning | C6.4.1 Ecoregions or Large Land / Seascapes |
| C6.4.2 Sites / Protected Areas |
| C6.4.3 Species / Taxonomic Groups |
| C6.4.4 Thematic Projects and Programs |
| C6.5 Site Infrastrucuture | C6.5.1 Protection |
| C6.5.2 Direct Management |
| C6.5.3 Resource Extraction |
| C6.5.4 Transport |
| C6.5.5 Tourism & Recreation |
| C6.5.6 Learning & Research Education |
|  |  | C6.5.7 Administration |
| C7 Legal & Policy Frameworks | C7.1 Laws, Regulations & Codes | C7.1.1 International Law, Conventions & Treaties |
| C7.1.2 National Law or Regulations |
| C7.1.3 State / Provincial Law or Regulations |
| C7.1.4 Municipal Law or Regulations |
| C7.1.5 Tribal Law & Formal Customs |
| C7.1.6 Private Sector / Civil Society Codes |
| C7.1.7 Cross-Sectoral |
| C7.2 Policies & Guidelines | C7.2.1 International Policies |
| C7.2.2 National Policies |
| C7.2.3 State / Provincial Policies |
| C7.2.4 Municipal Policies |
| C7.2.5 Tribal Policies |
| C7.2.6 Private Sector / Civil Society Policies |
|  |  | C7.2.7 Cross-Sectoral |
| C8 Research & Monitoring | C8.1 Basic Research & Status Monitoring | C8.1.1 Biological Targets |
| C8.1.2 Human Wellbeing Targets |
| C8.1.3 Threats / Biophysical Factors |
|  | C8.1.4 Socio-Economic Drivers |
| C8.2 Evaluation, Effectiveness Mesaures & Learning | C8.2.1 Specific Projects |
|  | C8.2.2 Cross-Project or Program Comparisons |
| C9 Education & Training | C8.2.3 Discipline-Level Frameworks Double Loop Learning |
| C9.1 Formal Education | C9.1.1 Primary Education |
| C9.1.2 Secondary Education |
| C9.1.3 College or University Education |
| C9.1.4 Adult / Continuing Education |
| C9.2 Training & Indivdiual Capacity Development | C9.2.1 Hands-On Coaching & Technical Assistance |
| C9.2.2 Workshops & Professional Development Training Courses |
| C9.2.3 Developing Training Materials |
| C10 Institutional Development | C10.1 Internal Organizational Management & Administration | C10.1.1 Governance |
| C10.1.2 Executive Management |
| C10.1.3 Human Resources |
| C10.1.4 Financial & Legal Management |
| C10.1.5 Fundraising |
| C10.1.6 Communications |
| C10.1.7 Program / Project Management |
| C10.1.8 Provision of Organisational Facilities & Technology |
|  | C10.1.9 Support Functions |
| C10.2 External Organizational Development & Support | C10.2.1 Direct Organizational Support Consulting / Volunteering |
| C10.2.2 Organizational Establishment & Incubation |
| C10.2.3 Providing Association / Membership Services |
| C10.2.4 Developing / Providing Organizational Management Tools |
| C10.3 Alliance & Partnership Development | C10.3.1 Coordinating Conservation Implementation |
| C10.3.2 Knowledge Generation & Sharing |
| C10.4 Financing Conservation | C10.4.1 Member / Small Contributions |
|  | C10.4.2 Unrestricted Grants |
|  | C10.4.3 Restricted Grants |
|  | C10.4.4 Program Related Investments / Soft Loans |
|  | C10.4.5 Commercial Loans |
|  | C10.4.6 In-Kind Services |
|  | C10.4.7 Financing Mechanisms |
